# Supplementary material for: Matrilineal Composition of the Reconstructed Stock of the Szekler Horse Breed
Source: MDPI journal article supplement (doi:10.3390/agriculture13020456), 2023-02-15
Supplement: s1 [file s1]

Archive with 3 entries (3 files):
- Supplementary Material S1. Szekler horse_Agriculture_SuppMat1_Historical pictures.pdf
- Supplementary Material S2. Szekler horse_Agriculture_SuppMat2_Conformation.pdf
- Supplementary Material S3. Szekler horse_Agriculture_SuppMat3_Polymorphic_sites.pdf
