# Supplementary material for: Matrilineal Composition of the Reconstructed Stock of the Szekler Horse Breed
Source: MDPI journal article supplement (doi:10.3390/agriculture13020456), 2023-02-15
Supplement: s1 [file s1]

# Matrilineal composition of the reconstructed stock of the Szekler Horse breed

András Gáspárdy<sup>1,\*</sup>, Zsombor Wagenhoffer<sup>1</sup>, Dóra Fűrlinger<sup>1</sup>, Maja Halmágyi<sup>1</sup>, Imre Bodó<sup>2</sup>, Hovirag Lancioni<sup>3</sup>, Ákos Maróti-Agóts<sup>1</sup>

| sample ID | Sex | Haplogroup | Polymorph sites                                                                                 |
|-----------|-----|------------|-------------------------------------------------------------------------------------------------|
| #27       | 1   | A          | 15495 15826                                                                                     |
| #13       | 2   | A          | 15495 15826                                                                                     |
| #42       | 2   | A          | 15495 15826 16068                                                                               |
| #59       | 2   | A          | 15495 15723 15826                                                                               |
| #18       | 2   | A          | 15495 15826                                                                                     |
| #57       | 1   | B          | 15495 15650 15666 15720 15826 16055                                                             |
| #52       | 1   | B          | 15495 15650 15666 15720 15810 15826 16055                                                       |
| #25       | 1   | B          | 15495 15602 15650 15666 15720 16055                                                             |
| #58       | 2   | B          | 15495 15585 15650 15666 15720 15810 15826 16055                                                 |
| #15       | 2   | B          | 15495 15650 15666 15720 15826 16055                                                             |
| #33       | 2   | B          | 15495 15585 15650 15666 15720 15810 15826 16055                                                 |
| #02       | 2   | B          | 15495 15585 15650 15666 15720 15810 15826 16055                                                 |
| #29       | 2   | D          | 15495 15521 15596 15602 15720 15737 15770 15810 15870 15983delT 16087                           |
| #45       | 1   | E          | 15495 15542 15585 15597 15602 15650 15666 15720 15771 15870 15956 15974                         |
| #51       | 2   | E          | 15495 15542 15574 15585 15597 15602 15604 15650 15666 15720 15771 15870 15956 15974             |
| #36       | 1   | G          | 15495 15542 15597 15602 15635 15650 15666 15703 15720 15770 15870 16031                         |
| #10       | 1   | G          | 15495 15542 15597 15602 15635 15650 15666 15703 15720 15870                                     |
| #04       | 2   | G          | 15495 15542 15597 15602 15635 15650 15666 15703 15720 15770 15870 16031                         |
| #01       | 2   | G          | 15495 15542 15597 15602 15635 15650 15666 15703 15720 15770 15870 16031                         |
| #17       | 1   | I          | 15495 15538 15585 15602 15709 15720 15771 15826 15974                                           |
| #21       | 1   | I          | 15495 15538 15585 15602 15709 15720 15771 15826 15974                                           |
| #23       | 2   | I          | 15495 15538 15585 15602 15650 15709 15720 15771 15826 15870 15974                               |
| #06       | 2   | I          | 15495 15538 15585 15602 15650 15709 15720 15771 15826 15870 15974                               |
| #46       | 1   | J          | 15495 15532delC 15585 15602 15720 15771 15807 15827 15870 15871 16071                           |
| #49       | 1   | L          | 15494 15495 15496 15534 15585 15603 15649 15720 15771 15870 15871 15956 15974 16068 16081       |
| #38       | 1   | L          | 15494 15495 15496 15534 15585 15602 15603 15604 15649 15720 15771 15870 15871 15956 15974 16068 |
| #22       | 2   | L          | 15494 15495 15496 15534 15585 15603 15649 15720 15771 15870 15871 15956 15974 16068             |
| #12       | 2   | L          | 15494 15495 15496 15534 15585 15603 15649 15720 15771 15870 15871 15956 15974 16068             |
| #43       | 2   | L          | 15494 15495 15496 15534 15602 15603 15649 15720 15771 15870 15871 15956 15974 16068             |

|     |   |     |                                                                                                     |
|-----|---|-----|-----------------------------------------------------------------------------------------------------|
| #53 | 2 | L   | 15494 15495 15496 15534 15585 15603 15649 15720 15771 15870 15871 15956 15974 16068                 |
| #07 | 2 | L   | 15494 15495 15496 15534 15602 15603 15604 15649 15720 15771 15870 15871 15956 15974 16068           |
| #55 | 2 | L   | 15494 15495 15496 15534 15585 15602 15603 15604 15649 15720 15771 15870 15871 15956 15974 16068     |
| #41 | 2 | L   | 15494 15495 15496 15534 15585 15603 15649 15720 15771 15870 15871 15956 15974 16068 16081           |
| #54 | 1 | M   | 15495 15602 15617 15659 15720 15771 15806 15827 15869 15879 15956 16068 16080                       |
| #28 | 2 | M   | 15495 15597 15602 15617 15720 15771 15806 15827 15869 15956 16068 16080                             |
| #56 | 2 | M   | 15495 15602 15617 15659 15720 15771 15806 15827 15869 15956 16068 16080                             |
| #14 | 2 | M   | 15495 15602 15617 15720 15771 15806 15827 15869 15956 16007 16068 16077insA 16080                   |
| #11 | 2 | N   | 15495 15584 15585 15601 15602 15720 15771 15806 15827 15838 15869 15956 16007 16068                 |
| #09 | 2 | N   | 15495 15585 15601 15602 15720 15771 15806 15827 15838 15869 15956 16007 16068                       |
| #44 | 1 | O'P | 15495 15597 15602 15667 15703 15720 15771 15777 15809 15956 16038 16063insC                         |
| #50 | 1 | O'P | 15495 15597 15602 15667 15703 15720 15771 15777 15809 15956 16038 16063insC                         |
| #16 | 2 | O'P | 15495 15602 15667 15703 15720 15771 15777 15809 15956 16038 16063insC                               |
| #39 | 2 | O'P | 15495 15597 15602 15667 15703 15720 15771 15777 15809 15956 16038 16063insC                         |
| #20 | 1 | Q   | 15495 15595 15602 15604 15703 15720 15740 15771 15777 15811 15956 16037 16038 16057 16063insC       |
| #35 | 1 | Q   | 15495 15585 15602 15612 15703 15720 15766 15771 15777 15809 15956 16038 16063insC                   |
| #26 | 1 | Q   | 15495 15595 15602 15604 15703 15720 15740 15771 15777 15811 15956 16037 16038 16057 16063 16063insC |
| #32 | 1 | Q   | 15495 15602 15604 15703 15720 15740 15771 15777 15811 15956 16037 16038 16057 16063insC             |
| #48 | 2 | Q   | 15495 15595 15602 15604 15703 15720 15740 15771 15777 15811 15956 16037 16038 16057 16063 16063insC |
| #08 | 2 | Q   | 15495 15595 15602 15604 15703 15720 15740 15771 15777 15811 15956 16037 16038 16057 16063 16063insC |
| #24 | 2 | Q   | 15495 15595 15602 15604 15703 15720 15740 15771 15777 15811 15956 16037 16038 16057 16063 16063insC |
| #19 | 2 | Q   | 15495 15595 15602 15604 15703 15720 15740 15771 15777 15811 15956 16037 16038 16057 16063 16063insC |
| #34 | 2 | Q   | 15495 15595 15602 15604 15703 15720 15740 15771 15777 15811 15956 16037 16038 16057 16063 16063insC |
| #40 | 2 | Q   | 15495 15595 15602 15604 15703 15720 15740 15771 15777 15811 15956 16037 16038 16057 16063 16063insC |
| #03 | 2 | Q   | 15495 15595 15602 15604 15703 15720 15740 15771 15777 15811 15956 16037 16038 16057 16063 16063insC |
| #47 | 2 | Q   | 15495 15595 15602 15604 15703 15720 15740 15771 15777 15811 15956 16037 16038 16057 16063 16063insC |
|     |   |     | 15495 15552 15597 15602 15604 15703 15720 15740 15771 15777 15787 15811 15956 16037 16038 16057     |
| #05 | 2 | Q   | 16063insC                                                                                           |
| #31 | 2 | Q   | 15495 15585 15602 15612 15703 15720 15766 15771 15777 15809 15956 16038 16063insC                   |
| #30 | 2 | Q   | 15495 15602 15604 15703 15720 15740 15771 15777 15811 15956 16037 16038 16057 16063insC             |
| #37 | 1 | R   | 15495 15598 15602 15615 15616 15659 15703 15720 15770 15775 15776 15806 15827 15956 15974 15996     |
