# Supplementary material for: Matrilineal Composition of the Reconstructed Stock of the Szekler Horse Breed
Source: MDPI journal article supplement (doi:10.3390/agriculture13020456), 2023-02-15
Supplement: s1 [file s1]

# Matrilineal composition of the reconstructed stock of the Szekler Horse breed

András Gáspárdy, Zsombor Wagenhoffer, Dóra Fűrlinger, Maja Halmágyi, Imre Bodó, Hovirag Lancioni, Ákos Maróti-Agóts

## Conformation of Szekler horse breed

Body measurement data (height at withers recorded by stick and tape, hearth girth, cannon girth) were recorded in 2014 in Szekler Land (13 mares and 5 stallions) [5] following Hankó's survey published in 1943 [2], which served as a basis for comparison.

In addition, the three body indices were calculated as it follows:

Calculation of body indices:

Tension-I (Spannung-I) = heart girth – height at withers (by stick)

Tension-III (Spannung-III) = [height at withers (by tape) – height at withers (by stick)]\*100

Cannon bone load = [cannon girth / heart girth]\*1000.

Then the data were adjusted for 7 years of age and a hierarchical general linear model (sex nested in investigation) was applied for processing.

The breed in adult age has a height at the withers (by stick) of 135-140, a hearth girth of 165-172, and a cannon girth of 18-19 cm. As a result of the comparative analysis for conformation, it can be said that there is no statistically significant difference between the two studied herds (investigations) - neither in terms of body measurements (Supplement B Table 1) nor body indices (Supplement B Table 2) that means that the herd selected as the basis for rescue can be considered identical to the previous Szekler horse in terms of conformation. So we can see a Szekler horse like the one that he found, and we can still keep the habitus of the Szekler horse and regenerate its herd.

Table S1. Body measurements adjusted for 7 years of age (in cm) ( [6]

| Traits                       | n   | Investigation | Sex      | LSM   | SEM   |
|------------------------------|-----|---------------|----------|-------|-------|
| Height at withers (by stick) | 5   | Hankó         | stallion | 135.4 | 1.76  |
|                              | 13  | Hankó         | mare     | 137.6 | 1.09  |
|                              | 2   | Ficsor        | stallion | 140.0 | 2.78  |
|                              | 80  | Ficsor        | mare     | 135.2 | 0.44  |
| p-value/overall mean         | 100 | 0.537         | 0.141    | 137.1 | 1.52  |
| Heart girth                  | 5   | Hankó         | stallion | 165.5 | 3.30  |
|                              | 13  | Hankó         | mare     | 172.3 | 2.05  |
|                              | 2   | Ficsor        | stallion | 168.5 | 5.22  |
|                              | 80  | Ficsor        | mare     | 165.9 | 0.83  |
| p-value                      | 100 | 0.604         | 0.200    | 168.1 | 2.85  |
| Cannon girth                 | 5   | Hankó         | stallion | 18.05 | 0.481 |
|                              | 13  | Hankó         | mare     | 18.14 | 0.298 |
|                              | 2   | Ficsor        | stallion | 19.00 | 0.760 |
|                              | 80  | Ficsor        | mare     | 17.87 | 0.120 |
| p-value                      | 100 | 0.476         | 0.341    | 18.3  | 0.42  |

Table S2. Body indices adjusted for 7 years of age [6]

| Traits                        | n   | Investigation | Sex      | LSM   | SEM  |
|-------------------------------|-----|---------------|----------|-------|------|
| Tension-I<br>(Spannung-I)     | 5   | Hankó         | stallion | 30.1  | 3.13 |
|                               | 13  | Hankó         | mare     | 34.7  | 1.94 |
|                               | 2   | Ficsor        | stallion | 28.5  | 4.95 |
|                               | 80  | Ficsor        | mare     | 30.7  | 0.78 |
| p-value                       | 100 | 0.372         | 0.412    | 31.0  | 2.70 |
| Tension-III<br>(Spannung-III) | 5   | Hankó         | stallion | 122.2 | 2.38 |
|                               | 13  | Hankó         | mare     | 125.2 | 1.47 |
|                               | 2   | Ficsor        | stallion | 120.4 | 3.76 |
|                               | 80  | Ficsor        | mare     | 122.8 | 0.59 |
| p-value                       | 100 | 0.370         | 0.452    | 122.7 | 2.05 |
| Cannon bone load              | 5   | Hankó         | stallion | 108.9 | 3.16 |
|                               | 13  | Hankó         | mare     | 105.5 | 1.96 |
|                               | 2   | Ficsor        | stallion | 112.8 | 5.00 |
|                               | 80  | Ficsor        | mare     | 107.9 | 0.79 |
| p-value                       | 100 | 0.323         | 0.407    | 108.8 | 2.73 |

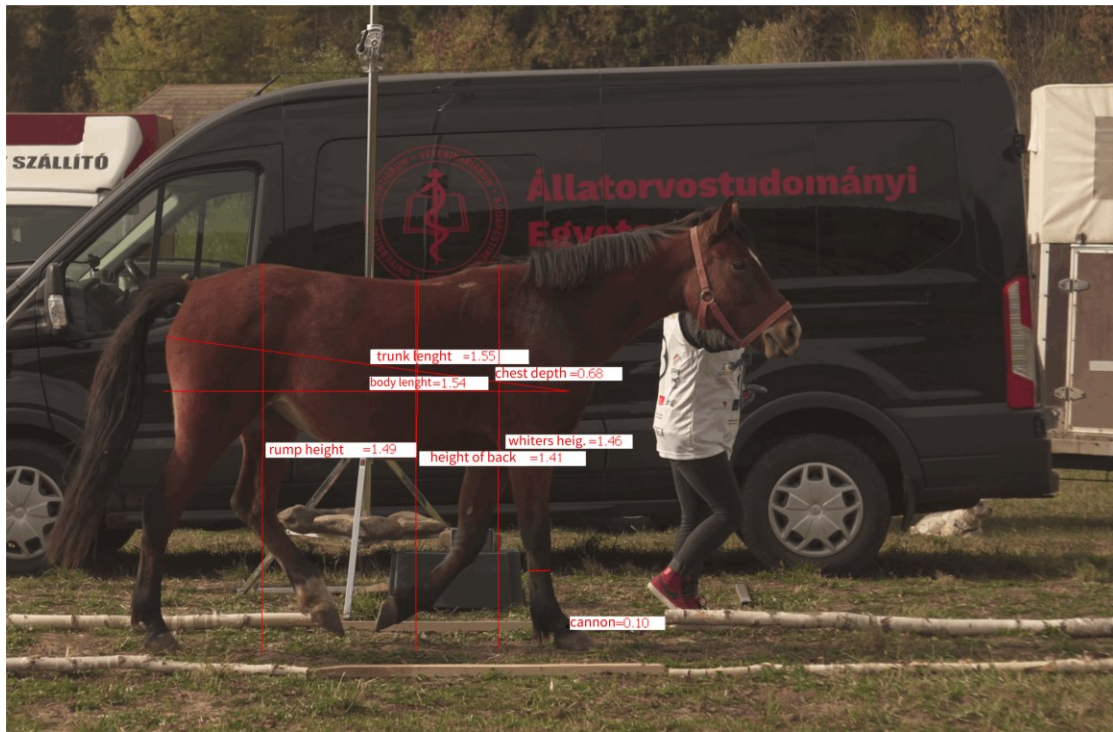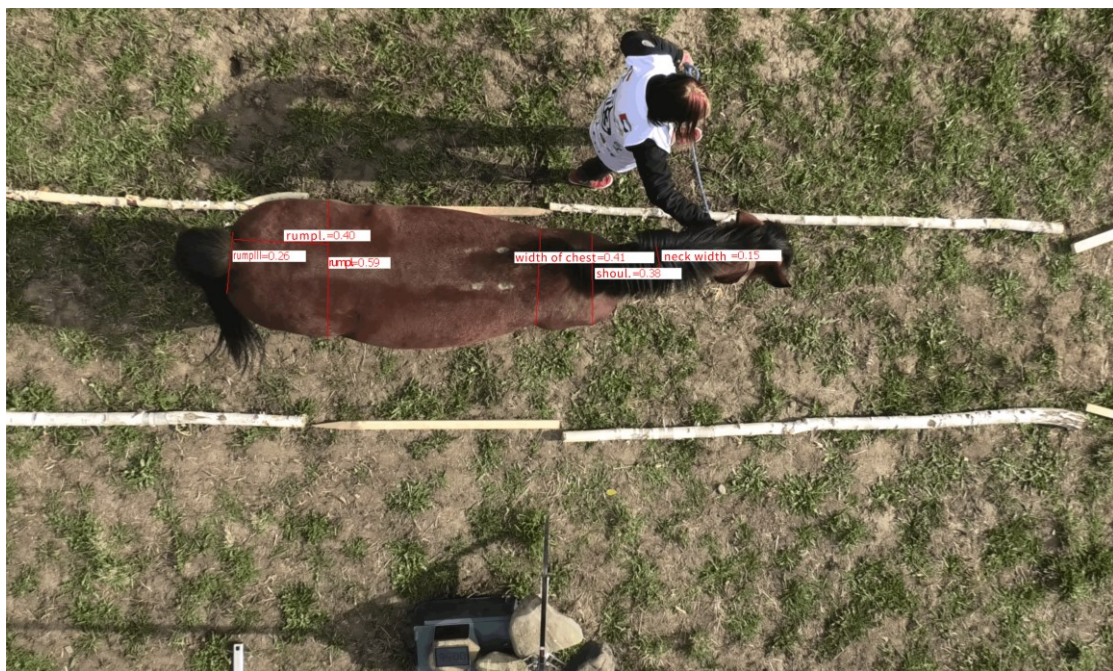

Figure S8. Measuring pictures of VATEM at Kászón from side (1) and above (2) view, 2021

Table S3. Body measurements adjusted (by use of second degree regression) for 7 years of age (in cm) derived from the VATEM method (n=19 mares, P-value shows the age effect on the trait)

| Traits          | LSM   | SEM  | P-value |
|-----------------|-------|------|---------|
| Trunk length    | 148.2 | 2.41 | 0.798   |
| Sacral height   | 136.5 | 2.52 | 0.227   |
| Dorsal height   | 130.8 | 2.00 | 0.224   |
| Withers' height | 137.3 | 2.43 | 0.146   |
| Chest depth     | 65.0  | 0.40 | 0.101   |
| Shoulder width* | 30.7  | 1.22 | 0.028   |
| Chest width**   | 35.8  | 1.61 | 0.033   |
| Rump-I          | 48.2  | 1.98 | 0.093   |
| Rump-III        | 19.2  | 0.96 | 0.841   |
| Rump length     | 31.1  | 1.39 | 0.296   |

\*Shoulder width: *distance between the greater tubercle of the left and right humerus bones*

\*\*Chest width: *width of breast measured just behind the elbows*



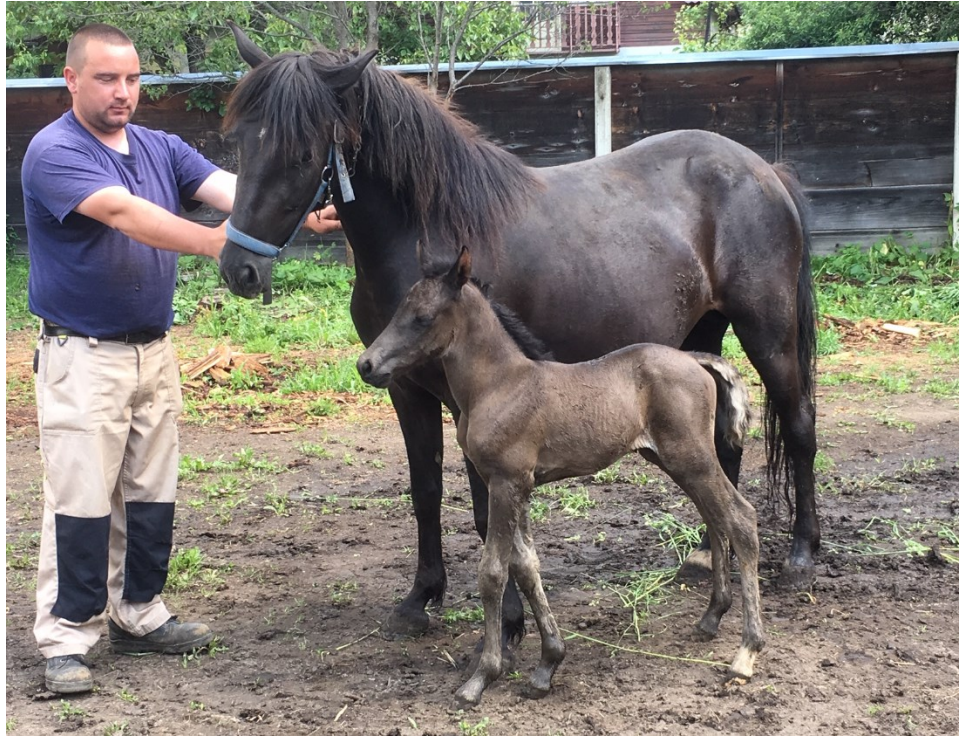

Figure S9. Szekler mare with foal at Kászontíz (Romania)

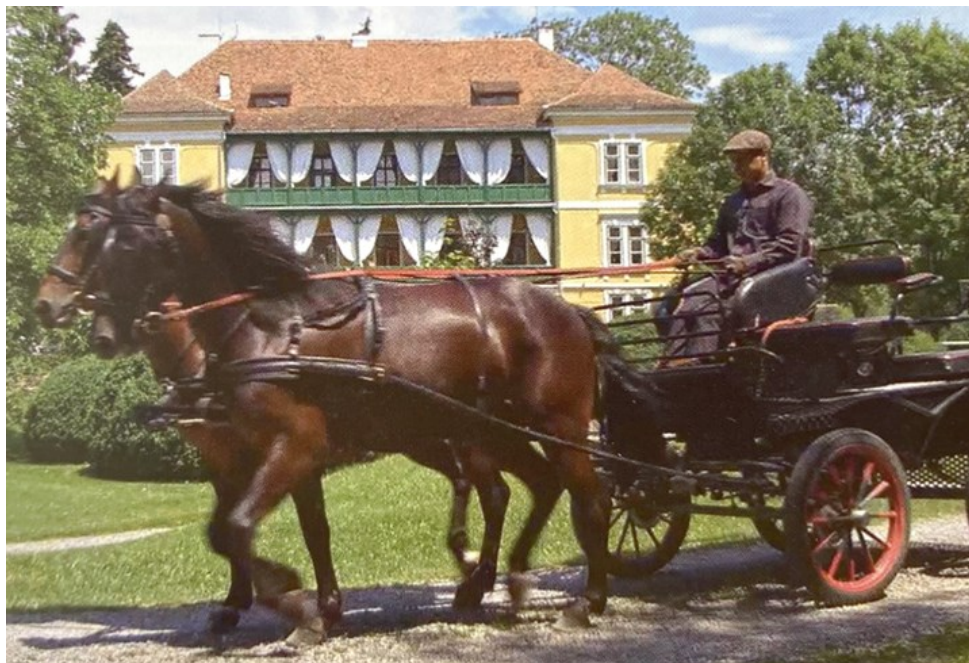

Figure S10. Szekler Horses driven in a two-in-hand carriage in Zabola at the Mikes estate (Romania)



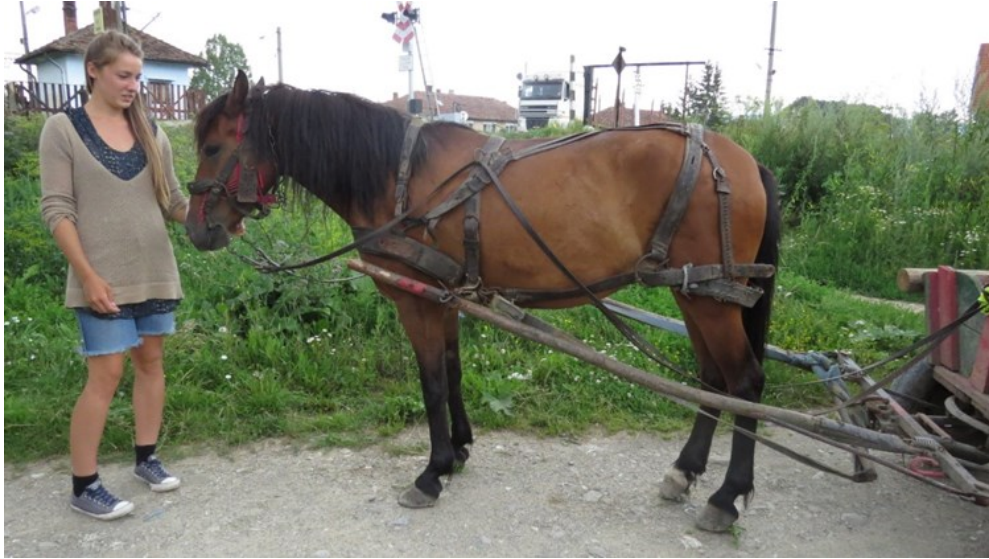

Figure S11. Szekler Horse in everyday work in Kászonfeltíz (Romania)

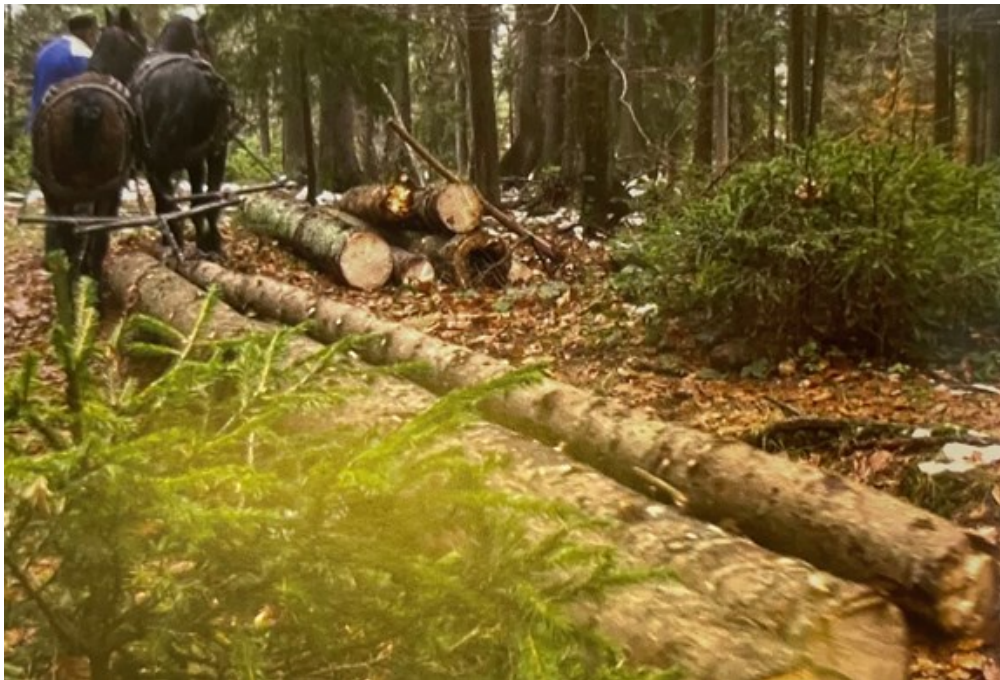

Figure S12. Szekler Horses in forestry work near Csíkszentkirály (screen shot from the movie “Székely lóra székely!” by Dénes Daczó (Romania)

## References (numbering according to the main text)

2. Hankó, B. *Székely lovak* (in Hungarian). Nagy Jenő és Fia Könyvnyomdája: Kolozsvár, Magyarország, 1943; p. 26.
5. Bodó, I.; Hecker, W.; Surján, Gy. *A székely ló* (in Hungarian). Pharma Press Nyomdaipari Kft.: Budapest, Magyarország, 2021; pp. 50–53.
6. Ficsor, Cs. A székely ló fajta-regenerálását támogató küllemteni összehasonlító vizsgálat (A comparative study of conformation supporting the breed regeneration of the Szekler horse, in Hungarian). M.Sc. Thesis. Szent István University, Faculty of Agricultural- and Environmental Sciences, Gödöllő, 2016
7. Gáspárdy, A.; Ficsor, Cs.; Simon, L.; Bodó, I. A possible rescue of Székely Horse. The breed “Székely ló” is extinct, but the type “Székely ló” lives on (in remote areas of the Carpathian Mountains). Paper on “*Unrecognised and Isolated Populations of rare Breeds and Varieties*” 9th European Seminar on Agrobiodiversity and Annual Meeting of the SAVE Network, Lake Kerkini National Park, Greece, 11-13 September 2015.  
[https://www.save-foundation.net/images/konferenzen/2015/Andras\\_Gaspardy\\_Szekely\\_Horse\\_2015.pdf](https://www.save-foundation.net/images/konferenzen/2015/Andras_Gaspardy_Szekely_Horse_2015.pdf)

Figures S9-S12 courtesy of Mereklye Association.
