# Supplementary material for: Matrilineal Composition of the Reconstructed Stock of the Szekler Horse Breed
Source: MDPI journal article supplement (doi:10.3390/agriculture13020456), 2023-02-15
Supplement: s1 [file s1]

# Matrilineal composition of the reconstructed stock of the Szekler Horse breed

András Gáspárdy, Zsombor Wagenhoffer, Dóra Fűrlinger, Halmágyi Maja, Imre Bodó, Hovirag Lancioni, Ákos Maróti-Agóts

## Historical imagery of Szekler horse breed

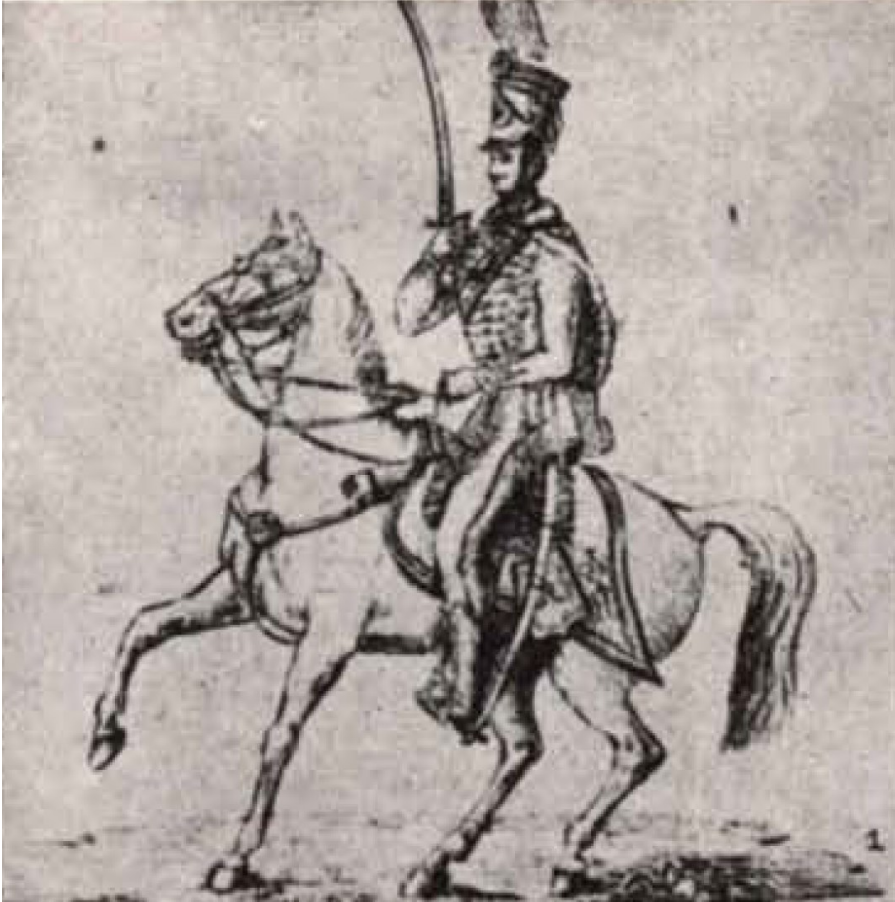

Figure S1. Cover page of Alistai Mátyus Nepomuk János: A Nemzeti Lovag. [1]

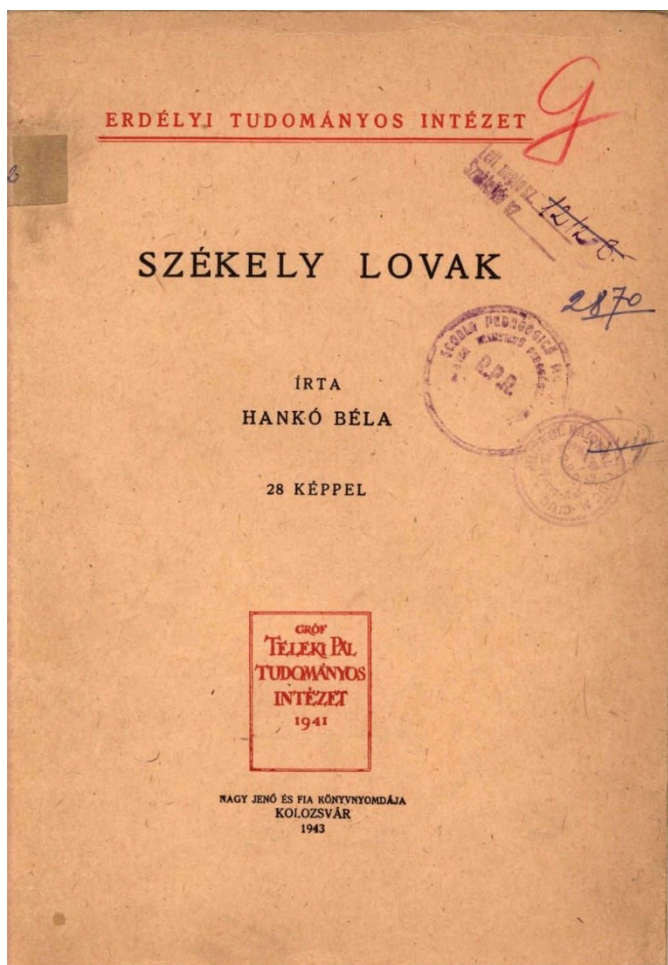

Figure S2. Cover page of Székely lovak (Szekler/Sicul Horses). [1]

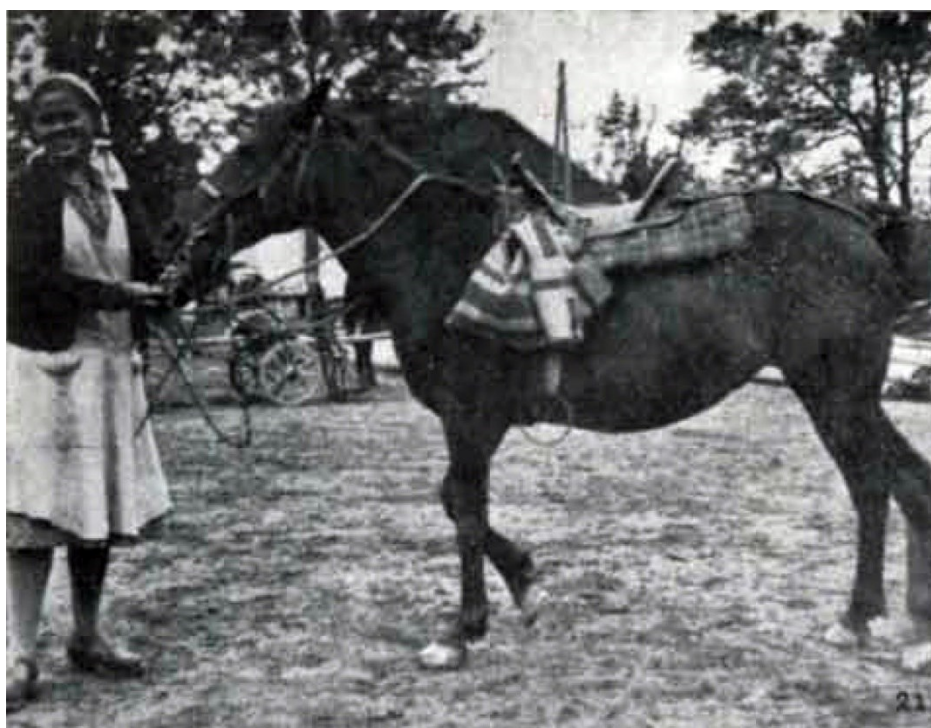

Figure S3. The Hungarian wood-saddle is fixed by one strap. 21. Table VI. [1]

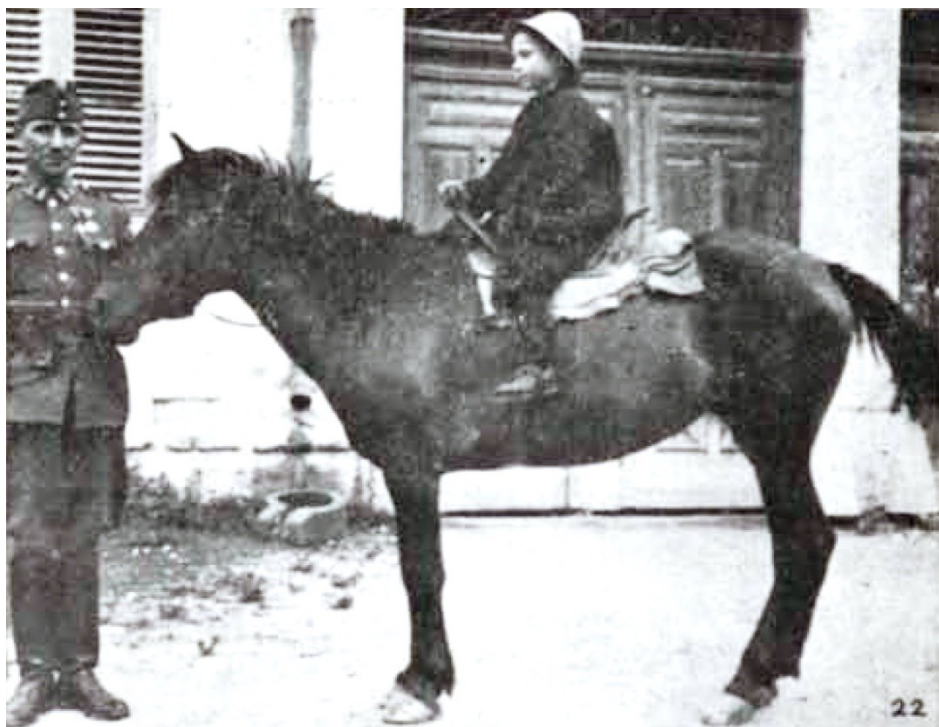

Figure S4. The the Hungarian wood-saddle is fixed by one strap 22. Table VI. [1]

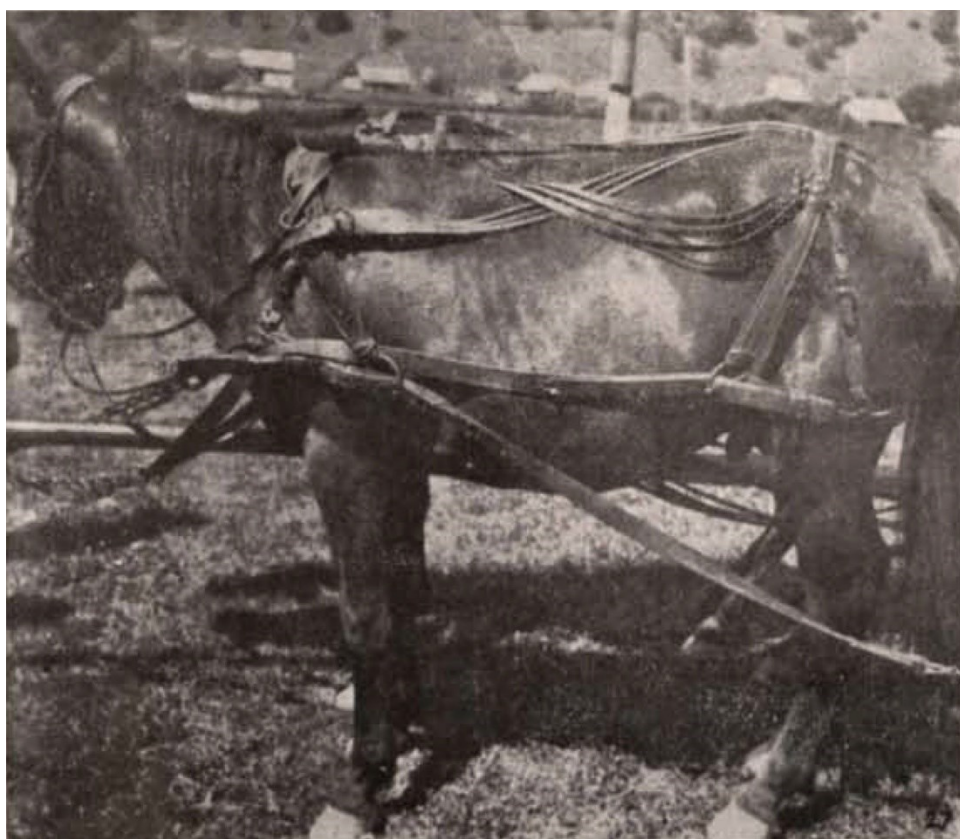

Figure S5. Szekler horse in harness. Table VII. [1]



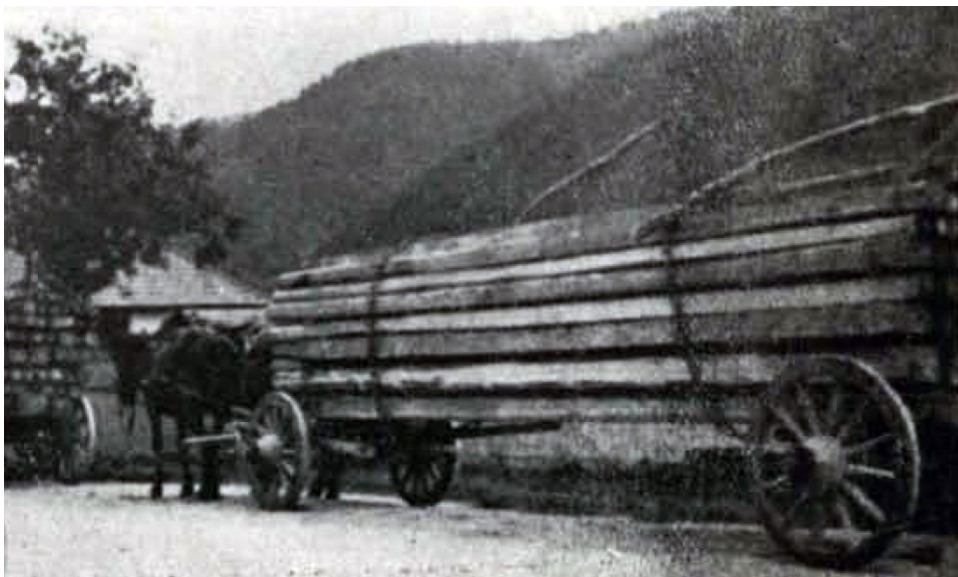

Figure S6. Wood transport. Table VII. [1]

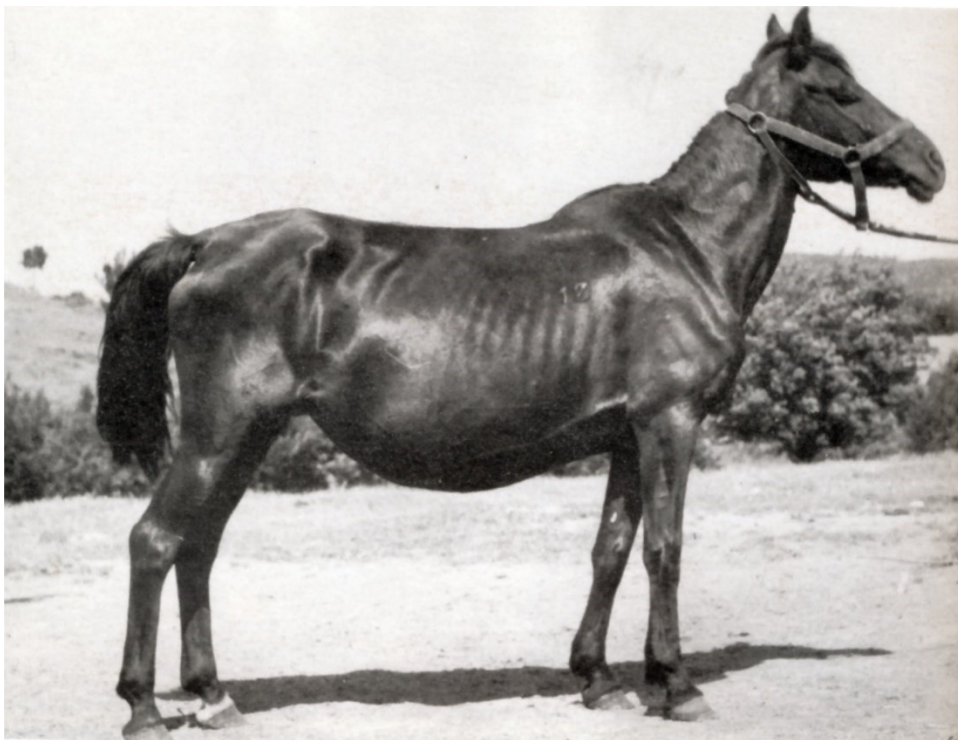

Figure S7. Szekler horse. [2]

## References

1. Hankó, B.: Székely lovak (Szekler/Sicul Horses). Kolozsvár, 1943.
2. Bodó Imre Hecker Walter: Lótenyésztők kézikönyve (Horsebreeder's Handbook). Budapest, 1992. pp 158.
